# Supplementary material for: Overcoming challenges to data quality in the ASPREE clinical trial
Source: Springer Nature journal article supplement (doi:10.1186/s13063-019-3789-2), 2019-12-01
Supplement: MOESM3 [file 17486944]

**Table S1: References ranges and query logic for out-of-range data queries performed on numeric data**

| Field#                                      | Value range*                             | Change over time query range^                                                                                |
|---------------------------------------------|------------------------------------------|--------------------------------------------------------------------------------------------------------------|
| All Data                                    | Missing values                           | N/A                                                                                                          |
| All Data                                    | Illogical values                         | N/A                                                                                                          |
| US Total Cholesterol                        | 70 - 375 mg/dL                           | 3 standard deviations from the mean change between baseline and year 1                                       |
| US Low-density Lipo-protein                 | 20 - 375 mg/dL                           |                                                                                                              |
| US High-density Lipo-protein                | 0.1 - 300 mg/dL                          |                                                                                                              |
| US Triglycerides                            | 0.1 - 850 mg/dL                          |                                                                                                              |
| US Creatinine                               | 0.5 - 1.7 mg/dL                          |                                                                                                              |
| US Glucose                                  | 35 - 250 mg/dL                           |                                                                                                              |
| US Haemoglobin                              | 12 - 25 g/dL                             |                                                                                                              |
| US Urine Albumin Creatinine ratio           | 0.8 - 665 mg/g                           |                                                                                                              |
| AUS Total Cholesterol                       | 2.0 - 10 mmol/L                          |                                                                                                              |
| AUS Low-density Lipoprotein                 | 0.5 - 10 mmol/L                          |                                                                                                              |
| AUS High-density Lipoprotein                | 0.1 - 8 mmol/L                           |                                                                                                              |
| AUS Triglycerides                           | 0.1 - 9.9 mmol/L                         |                                                                                                              |
| AUS Creatinine                              | 40 - 150 µmol/L                          |                                                                                                              |
| AUS Glucose                                 | 2 - 15 mmol/L                            |                                                                                                              |
| AUS Haemoglobin                             | Female 11 - 25 g/dL<br>Male 12 - 25 g/dL |                                                                                                              |
| AUS Urine Albumin Creatinine Ratio          | 0.1 - 75 mg/mmol                         |                                                                                                              |
| Controlled Oral Word Association Test score | 1 - 40 score                             |                                                                                                              |
| Symbol Digit Modalities Test score          | 1 - 100 score                            |                                                                                                              |
| Grip strength 1st hand                      | 5 - 65                                   |                                                                                                              |
| Grip strength 2nd hand                      | 5 - 65                                   |                                                                                                              |
| Gait speed test 1                           | 1.6 - 15 seconds                         |                                                                                                              |
| Gait speed test 2                           | 1.6 - 15 seconds                         |                                                                                                              |
| Weight                                      | 35 - 140 kg                              |                                                                                                              |
| Abdominal circumference                     | 45 - 145 cm                              |                                                                                                              |
| Height                                      | 1.4 - 2.1 m                              | 3 standard deviations from the mean change between baseline and year 5 (when height was re-measured)         |
| Systolic blood pressure - first measure     | 90 - 200 mmHg                            | 3 standard deviations from the mean change between the average SBP at baseline and the average SBP at year 1 |
| Systolic blood pressure - second measure    | 90 - 200 mmHg                            |                                                                                                              |
| Systolic blood pressure - third measure     | 90 - 200 mmHg                            |                                                                                                              |
| Diastolic blood pressure - first measure    | 50 - 110 mmHg                            | 3 standard deviations from the mean change between the average DBP at baseline and the average DBP at year 1 |
| Diastolic blood pressure - second measure   | 50 - 110 mmHg                            |                                                                                                              |
| Diastolic blood pressure - third measure    | 50 - 110 mmHg                            |                                                                                                              |
| Heart rate - first measure                  | 40 - 120 bpm                             | 3 standard deviations from the mean change between the average HR at baseline and the average HR at year 1   |
| Heart rate - second measure                 | 40 - 120 bpm                             |                                                                                                              |
| Heart rate - third measure                  | 40 - 120 bpm                             |                                                                                                              |

The above Table shows the variables that were subject to out-of-range value and out-of-range change over time queries at every point of data collection (i.e. at baseline and all data collection visits thereafter).

# Variable within AWARD that was queried for out-of-range values and out-of-range change over time.

\* Acceptable range. Values below or above the cutoffs provided were considered to be out-of-range and were specifically checked against source documentation.

^ Logic for determination of data that were considered out-of-range based on previously entered values. These data (both the data in question and the previously entered data) were checked against the source documentation.
